1 **A zebrafish model of developmental joint dysplasia: Manipulating the larval**  
2 **mechanical environment to drive the malformation and recovery of joint shape.**

3

4 **Short title – Zebrafish joint shape recovery**

5

6 **Authors**

7 **Karen A Roddy<sup>1</sup>, Roddy EH Skinner<sup>1</sup>, Lucy H Brunt<sup>1</sup>, Erika Kague<sup>1</sup>, Stephen Cross<sup>1</sup>,**  
8 **Emily J Rayfield<sup>2</sup>, Chrissy L Hammond<sup>1\*</sup>**

9 1. School of Physiology, Pharmacology and Neuroscience, University of Bristol, BS8 1TD,  
10 U.K.

11 2. School of Earth Sciences, University of Bristol, BS8 1TD, U.K.

12 \* Email: Chrissy.Hammond@bristol.ac.uk

13

14

15 **Abstract**

16 Developmental dysplasia of the hip (DDH), a malformation of the acetabulum, is a frequent  
17 cause of early onset osteoarthritis. The disease encompasses a spectrum of severities,  
18 some of which are more amenable to treatment. Embryonic immobilisation significantly  
19 impairs the development of joint shape however the impact of this malformation to the  
20 function and growth of the joint in the short to medium term is unclear. We developed a  
21 novel model of developmental joint dysplasia using the zebrafish jaw joint to identify the  
22 mechanisms regulating cellular plasticity and ability to recover joint shape and function.  
23 Larval zebrafish were immobilised either pharmacologically or using targeted ablation of jaw  
24 muscles to induce an altered joint shape. Following restoration of muscle activity we  
25 dynamically monitored the joint shape and function in individuals at cellular resolution  
26 impossible in other vertebrate species. Reflecting the variability of the human condition we  
27 found a proportion of joints will recover both their shape and function, while others will not;  
28 despite coming from a genetically homogenous population. This allowed us to study what  
29 controls likelihood of recovery; we identified a number of cellular changes that predict  
30 likelihood of functional recovery, including position of precursor cells, and specific patterns of  
31 proliferation, migration and differentiation in joints and associated connective tissues. These  
32 factors together predict recovery better than severity of malformation alone. Using Finite  
33 Element Analysis we studied the mechanics of joints representative of ones that recover and  
34 those that fail to identify differences in patterns of strain that could explain the cellular  
35 behaviours that underpin likelihood of recovery. Thus, this model would enable the study of  
36 the short to long term impact of altered joint shape on function and could help to identify the  
37 changes that render an individual more receptive to treatment and therefore may potentially  
38 be indicative of long term joint health.

39

## 40 **Introduction**

41 The complex shape of a synovial joint is a vital component of its function; governing its range  
42 of motion and capacity to efficiently transmit load. Congenital joint shape defects, such as  
43 developmental dysplasia of the hip (DDH) increase an individual's risk of osteoarthritis (OA)  
44 even if treated successfully; although some subtle forms of DDH can resolve spontaneously  
45 [1]. DDH, caused by a shallow acetabulum leading to a joint prone to subluxation is  
46 associated with factors that constrain foetal and postnatal movement including breech  
47 presentation and swaddling [2]. DDH has a dramatic impact on the hip joint but more subtle  
48 variations in joint shape have been associated with increased risk of developing  
49 osteoarthritis [3,4]. Thus, joint shape is an important regulator of joint fitness. Current  
50 treatment for DDH using a Pavlic harness relies on postnatal remodelling and growth to  
51 modify the shape of growing joint, however, success is linked to early treatment and failure  
52 to surgical intervention [1]. The mechanisms through which these abnormal joint shapes are  
53 corrected, and the factors governing the optimal window for treatment remain unclear.

54 Mechanoregulatory signals generated by muscle contraction are vital to the development of  
55 its characteristic 3D structure [5-9] and have been suggested as primary driver of DDH  
56 development [10]. Studies in the chick [6,11,12], mouse [13-15] and zebrafish [5,15,16] have  
57 shown that loss of muscle activity leads to malformed joints lacking features such as  
58 ligaments, articular cartilage, meniscus and articular processes. Gradients of shear, tension  
59 and compression are created during muscle contractions and cells are differentially  
60 responsive to these varying mechanical signals altering their cell behaviour or differentiation  
61 in response to the changing mechanical force [17-19]. Mechanical stimulus is also a major  
62 modifier of disease progression in OA. Immobilising murine knee joints after surgical  
63 destabilisation, reduces expression of OA associated genes and protects these joints from  
64 degeneration [20] and also slows tissue damage in patients with established OA [21,22].  
65 However, immobilisation can also drive the degeneration of healthy cartilage [23]. Thus,  
66 mechanical stimulus wrongly applied can be detrimental to joint health. How aberrant

67 mechanical stimuli, generated by the movement of a malformed joint might be integrated into  
68 the regulatory framework governing postnatal growth in order to achieve joint recovery is  
69 poorly understood.

70 Various models of DDH exist; including spontaneous canine models [24,25], cast/swaddling  
71 models in rats and rabbits [26,27] and foetal immobilisation [10]. Canine and cast/swaddling  
72 models do not recapitulate the initial development of DDH as the hip is normal at birth. The  
73 chick immobilisation model can induce a shallow acetabulum however joint degeneration  
74 has not been confirmed. Here we present a zebrafish model that facilitates the study of the  
75 early developmental steps leading to a subluxed joint and the testing of factors underpinning  
76 likelihood of recovery. Zebrafish develop externally making them tractable for drug treatment  
77 or laser surgery. Zebrafish have synovial joints and have been demonstrated to develop  
78 phenotypes resembling osteoarthritis as they age [28,29]. Most importantly the availability of  
79 transgenic lines labelling the developing skeleton enables studies of cell behaviour in live  
80 larvae [39]. We hypothesise that restoration of movement, following immobilisation, drives  
81 morphogenetic changes in the zebrafish jaw and joint remodelling. To test this, we induced  
82 jaw joint malformation using a period of pharmacological immobilisation [5] or by muscle  
83 ablation, then allowed movement to resume and tracked the changing jaw shape, cell  
84 behaviour and differentiation. Laser ablation has been used to study repair mechanisms  
85 after injury [30] and was used here to sever the adductor mandibularis. We show that  
86 immobilised larvae that recover have a significantly different joint shape to those that fail to  
87 recover; and they successfully remodel the joint and associated tissues including the  
88 ligament and enthesis. We also demonstrate that recovery potential is underpinned, in part,  
89 by changes to cell orientation, migration and proliferation. Using finite element analysis to  
90 explore the mechanoregulatory environment experienced by recovering and subluxed larvae  
91 we identify differences in patterns of strain that could explain the cellular behaviours that  
92 underpin likelihood of recovery.

93

94 **Results**

95 *Resumption of movement following immobilisation leads to changes in jaw placement.*

96 The anaesthetic MS222 (tricaine) induces flaccid paralysis in zebrafish and has been shown  
97 to lead to malformation of the jaw joint and changes to joint cell behaviour [5,15,16]. To  
98 determine the capacity of these malformed joints to recover functionality larvae were treated  
99 with MS222 for 48hrs from 3-5dpf then allowed to resume movement. To rule out secondary  
100 drug effects and to investigate the impact of targeted change to jaw mechanics we also  
101 developed a model in which we bilaterally ablated the adductor mandibularis, which is  
102 responsible for jaw closure, using a laser. Following ablation, muscle regrowth was visible  
103 by 1 day post ablation (dpa) and muscle fibres reconnected the elements and were  
104 contractile by 2dpa (at 5dpf) (S1 Fig).

105 Following either anaesthesia or muscle ablation the jaw joint was subluxed in all larvae such  
106 that it was rendered unable to close (S1-3 Video) at 5dpf (Fig 1B-C, 1-2). Underlying this  
107 loss of function was a significant change to the shape of the MC and jaw joint which lacked  
108 the complementary surfaces of control joints (Fig 1A-C, 3-4). Rather, the MC overlapped the  
109 palatoquadrate on the medial side of the joint (Fig 1A-C, 3-4, arrowhead). Anaesthesia and  
110 muscle ablation also caused flattening and thickening of the anterior tip of the MC, close to  
111 the mandibular symphysis (Fig 1B3, C3, double headed arrow). Following removal from  
112 MS222, treated larvae moved their jaws significantly more frequently than control larvae (Fig  
113 1D), potentially due to mild hypoxia. Although all AM-ablated larvae resumed movement,  
114 indicating regeneration, they had significantly fewer jaw movements than controls (Fig 1D)  
115 (S1 Fig), likely due to the reduced contractile ability of the regenerating fibres at the stages  
116 observed.

117

118 By 7dpf the majority of immobilised and of ablated larvae recovered from the subluxed  
119 position, such that they could now fully close the mouth (Fig 1E-I, 1,2 arrows). Larvae with a

120 “recovered” jaw position (Fig 1F, H) displayed complementary joint surfaces, and an  
121 appropriately positioned retro-articular process (RAP) (Fig 1F,H), resembling the  
122 appearance of unmanipulated controls. The remaining larvae retained their subluxed jaw  
123 position (Fig 1G1-2, I1-2, arrows) with overlapping joint surfaces (Fig 1G3-4, I3-4  
124 arrowhead).

125 Severity of joint malformation correlates with timing and duration of anaesthesia treatment  
126 [5]. We varied the timing and duration of treatment to determine if these factors also  
127 determine ability to recover joint shape and function following resumption of movement. We  
128 immobilised zebrafish for 24, 48 or 56 hours from 72 or 96hpf (Fig 1J) and monitored the  
129 percentage of larvae that recovered following drug wash out and resumption of muscle  
130 activity (Fig 1K). Recovery was significantly affected by the timing of treatment. When  
131 movement resumed prior to 4dpf 95% of larvae recovered by 7dpf, a significantly higher  
132 percentage than the worst performing treatment group (those larvae immobilised for 56  
133 hours) from which only 69 % recovered (Fig 1K). Following ablation 84% of larvae  
134 recovered, however, due to low sample number (n=30) these were not included in statistical  
135 tests. These results indicate that there is sufficient joint plasticity at 5dpf to enable most  
136 larvae to recover functionality, however earlier resumption of movement significantly  
137 improves chance of recovery.

### 138 *Anaesthesia significantly alters the overall shape of the Meckel’s cartilage*

139 To investigate the impact of immobilisation and restored movement on MC shape we used  
140 geometric morphometric analysis. In addition to immobilised and ablated larvae we included  
141 Myod<sup>-/-</sup> which lack jaw musculature [31] to model continued jaw joint paralysis. Control,  
142 Myod<sup>-/-</sup>, larvae anaesthetised from 3-5dpf and larvae with ablated AM were imaged live at  
143 5dpf then each larva re-imaged at 7dpf. At 7dpf immobilised and AM-ablated larvae were  
144 classified as “Subluxed” or “Recovered”. Outlines of the MC at 5dpf (Fig 2A) were analysed  
145 using npManova and between-groups Principal Component Analysis (bgPCA) [16] to  
146 quantify how MC shape differs between the groups. Each principal component (PC)

147 describes a trend in how the shapes within the analysis vary. Thus, similar shapes occupy  
148 similar positions along a PC axis while different shapes occupy opposing ends. A shape is  
149 described fully by all components as they may be similar in one component but differ in  
150 another.

151 Loss of muscle activity had a significant effect on the shape of the MC at 5dpf. The  
152 anaesthetised, ablated and Myod<sup>-/-</sup> larvae were all significantly different from control larvae  
153 (Fig 2B, S1 Table) and occupied different quadrants in PC1 and PC2 of the morphospace  
154 relative to control. PC1 accounts for 78.4% of variation in shape, separates the groups  
155 based on increasing MC width near the mandibular symphysis and degree of joint overlap  
156 (Fig 2D, F). PC2 accounts for 15.5% of the variation and captures the shape of the MC arch;  
157 control and Myod mutants are more gently arched than anaesthetised or ablated larvae.  
158 Ablated and anaesthetised larvae collocate while Myod mutants are dramatically different to  
159 controls. At 5dpf there was no significant difference in shape between larvae that will recover  
160 and those that remain subluxed at 7dpf (Fig 2B, D, F S1 Table). As such, MC shape at 5dpf  
161 does not reliably predict likelihood of recovery.

162 Resuming movement had a significant impact on the shape of the larval jaw at 7dpf. PC1  
163 and PC2 accounted for 73.4% and 14.3% of variation between the groups; describing similar  
164 trends as at 5dpf (Fig 2E). The shapes of recovered jaws at 7dpf were significantly different  
165 from those that remained subluxed (Fig 2C, S2 Table) occupying an intermediate position in  
166 the morphospace plot, overlapping both the control and subluxed domains (Fig 2E, G).  
167 These data indicate that within a pool of similarly treated larvae a subgroup can recover a  
168 functional joint and the resultant recovered shape differs significantly from the shape of  
169 those that remain subluxed.

170 *Differences in cell orientation, shape and size precede recovery.*

171 Morphospace analysis highlighted the impact of altered load on mandibular symphysis and  
172 jaw joint shape. The differentiation of cells at both sites is affected by loss of muscle activity

173 [5,15,16]. As chondrocytes mature their appearance changes from small spherical cells to  
174 larger ellipsoids [32]. Therefore, chondrocyte differentiation state can be inferred by  
175 measuring their size and circularity. A perfect circle has a circularity of 1, with decreasing  
176 values for elongated cells. We compared the shape and size of chondrocytes in the anterior  
177 MC in control, Myod<sup>-/-</sup>, anaesthetised and ablated larvae, with the latter two groups  
178 subdivided by their status at 7dpf. Cells flanking the mandibular symphysis were outlined  
179 and circularity and area calculated for each cell (Fig 3A-J). Due to the small number of AM  
180 ablated larvae that remained subluxed all further analysis on AM-ablated larvae were carried  
181 out on jaws that were classed as recovered at 7dpf. At 5dpf midline chondrocytes were  
182 significantly smaller and rounder in Myod<sup>-/-</sup> mutants and larvae that remain subluxed than  
183 controls and larvae that recover. At 7dpf only chondrocytes in larvae that remain immobile,  
184 i.e. Myod<sup>-/-</sup>, were significantly rounder than control, suggesting that movement drives  
185 maturation of this cell population.

186 Immobility leads to alterations to joint cell orientation and size [5]. To determine whether  
187 restoration of normal cell size and orientation is achieved during recovery we measured the  
188 chondrocytes located at the joint (Fig 3O-Q, S2 Fig). At 5dpf joint chondrocytes in  
189 anaesthetised larvae that will recover were statistically indistinguishable to controls; while  
190 chondrocytes in those that failed to recover, Myod<sup>-/-</sup> and AM-ablated larvae, were  
191 significantly smaller than the chondrocytes of controls (Fig 3P). No significant difference in  
192 cell size was seen between any of the groups at 7dpf; due to the variability of control cell  
193 size (Fig 3Q). Analysis of the orientation of the major axis of joint cells relative to the  
194 palatoquadrate surface, revealed significant differences in orientation of cells at 5dpf on both  
195 the medial and lateral joint sides in larvae that fail to recover relative to controls, whereas  
196 joint cells from larvae that will recover do not differ from controls. By 7dpf the orientation of  
197 cells in subluxed treated larvae are no longer significantly different from controls and  
198 recovered larvae, whereas Myod<sup>-/-</sup> larvae, which receive no mechanical input remain  
199 significantly different to controls (S2 Fig B, C). This data demonstrates that variation in size



200 and orientation of cells located at the joint and symphysis at 5dpf are associated with ability  
201 to recover; and that reapplication of mechanical stimulus allows cells to reorientate.

202 *Movement drives restored expression of joint associated genes*

203 Loss of muscle activity in amniotes leads to cartilage fusion in the joint territory driven by  
204 loss of joint specific markers in favour of the expression of *Collagen 2 (Col2)* and other  
205 cartilage markers [6,12,33]. We used the relationship between *Col2a1*, a marker of mature  
206 chondrocytes, and *Sox10*, a marker of neural crest [34] expressed in immature craniofacial  
207 chondrocytes and joint precursor cells (Fig 4A), to determine if joint boundaries re-emerge  
208 during recovery. At 3dpf cells expressing *Sox10* were seen across the whole joint, with  
209 particularly strong expression on the medial side where the RAP forms (Fig 4A 2, 3, 6). At 5  
210 and 7dpf cells in the joint line, tip of the RAP and 2-4 cells flanking the mandibular  
211 symphysis express high levels of *Sox10* and much lower levels of *Col2a1* (Fig 4 A4, 5, 7).

212 To alleviate variation in the intensity of *Sox10* or *Col2a1* due to copy number variation or  
213 imaging parameters we extracted the anti-correlation component of the “product of the  
214 difference of the mean” (PDM) [35] of the confocal dataset. In 5dpf controls *Sox10* was  
215 expressed across the joint line in cells where *Col2a1* was not expressed; these cells were  
216 clearly identifiable in the PDM (Fig 4B, arrows). In comparison immobilisation lead to a  
217 significant reduction in the size and definition of the joint domain, particularly apparent in  
218 *Myod* mutants (Fig 4B, D). The magnitude of the anti-correlation component, indicative of  
219 how different the two channels were, was also significantly reduced in *Myod*<sup>-/-</sup> larvae at 5dpf  
220 (S3 Fig).

221 At 7dpf the relative expression of *Sox10* and *Col2a1* remained significantly disrupted in  
222 subluxed and *Myod*<sup>-/-</sup> larvae (Fig 4C, E), whereas the joint region of recovered larvae and  
223 AM-ablated larvae were no longer significantly different to controls (Fig 4E). Thus, larvae  
224 capable of recovery reacquire a group of cells with high *Sox10* low *Col2a1*, suggestive of

225 immaturity/plasticity in the joint, whereas larvae that fail to recover or remain paralysed fail to  
226 maintain these joint specific cells.

227 *Recovery is driven by changes to cell proliferation and migration.*

228 We hypothesised that proliferation and/or migration of these *Sox10* high *Col2* low cells might  
229 drive joint recovery. Cell proliferation following the resumption of movement was measured  
230 by treating larvae with BrdU from 5-7dpf, at which time the larvae were sorted into recovered  
231 and subluxed groups, stained immune-fluorescently and quantified (Fig 5C, D). BrdU  
232 incorporation was significantly increased, relative to control, on both the medial and lateral  
233 side of the joint in subluxed larvae. In contrast, proliferation was only increased on the lateral  
234 side of the joint in recovered larvae (Fig 5 D). BrdU+ cells were present in larger numbers in  
235 the lateral joint margin (Fig 5A arrowhead) in both groups relative to control.

236 Cell migration during recovery was assayed by photoconversion of kaede-expressing cells in  
237 zebrafish carrying *Tg(Sox10:GAL4-VP16)* and *Tg(UAS:Kaede)* transgenes. Kaede protein is  
238 green in its native state but is irreversibly photoconverted to red using UV light. 8-10 cells  
239 were photoconverted at 5dpf on either the medial or the lateral side of joints in larvae that  
240 were anaesthetised and in controls. These larvae were then reimaged at 7dpf to track the  
241 behaviour of the photoconverted cells. The spread of cells across the joint was calculated as  
242 the change in the area of the photoconverted domain (Fig 5E, F), measured from max  
243 projections between 5 and 7dpf (Fig 5B, red outline). Cellular migration was significantly  
244 increased on the lateral side of recovered but not subluxed larvae (Fig 5E, F). There was  
245 also evidence of cellular reorientation on the lateral side of recovered joints that was not  
246 apparent in subluxed larvae (Fig 5B arrowhead). In comparison, no changes to cellular  
247 orientation or spread of photoconverted cells were detected on the medial side. This data  
248 indicates that cells at the joint retain the capacity to adapt to the mechanical environment  
249 and sculpt the joint by modifying regional patterns of cell migration and proliferation.

250 *Joint associated structures such as ligaments and their insertions are restored in recovered*  
251 *larvae.*

252 Immobilisation during development has been shown to have a significant impact on the  
253 structure of joint associated tissues such as ligaments and their attachments [6,11,36]. The  
254 RAP, the insertion site of the interoperculomandibular ligament (IOM) is significantly  
255 impacted by loss of mechanical load (Fig 1,2) [5,16]. *Col10a1:citrine (ColX)* was expressed  
256 by osteoblasts in the ligament entheses (Fig 6A ,E) [37] and at a lower level throughout the  
257 IOM ligament (Fig 6A, E). It was used to assess the impact of immobilisation (Fig 6 A-D) and  
258 recovery (Fig 6E-I) on osteoblast number in the RAP and ligament width. Immobilisation  
259 caused a significant reduction in osteoblast number in the RAP at 5dpf (Fig 6C). By 7dpf the  
260 number of osteoblasts at the RAP of subluxed, but not recovered larvae, were significantly  
261 fewer than controls (Fig 6 E-H).

262 At 5dpf, the width of the IOM ligament was significantly increased in immobilised larvae  
263 reflecting a loss of the tight cohesive structure characteristic of ligaments (Fig 5D). At 7dpf  
264 the subluxed cohort remained marginally larger but this was not significant, possibly due to  
265 the small sample number (n=4). We verified the recovery of the ligament by comparing the  
266 number of ligament cells that incorporated BrdU between 5 and 7dpf in control, subluxed  
267 and recovered larvae. Larvae that recover proliferated significantly more between 5 and 7dpf  
268 than either control or subluxed larvae. Therefore, larvae that successfully recover a  
269 functional shape also repair the degenerative impact of immobilisation on the interzone and  
270 joint associated tissues such as ligaments.

271 *Recovery potential is associated with regional differences in the pattern, magnitude and*  
272 *orientation of mechanical stimuli within the jaw*

273 Mechanical forces act as a form of positional information with cells behaving in a regionally  
274 specific manner dependent on its mechanical environment. We hypothesised that joint  
275 shape, cellular orientation and differentiation could feed into the mechanical environment

276 ,which in turn regulates the cells, producing a feedback loop resulting either in success or in  
277 failure. Renewed movement is required for the initiation of shape recovery and may drive the  
278 rapid correction seen in recovered larvae. Finite element (FE) models of representative 5dpf  
279 control, anaesthetised recovered and subluxed larva were analysed to identify potential  
280 differences in the pattern of biophysical stimuli experienced by larvae that recover and those  
281 that remain subluxed. The range of motion of the tip of the jaw in control and anaesthetised  
282 larvae was 53.3 (+/- 18.4)  $\mu\text{m}$  and 57.71(+/- 22.5)  $\mu\text{m}$  respectively, which was replicated by  
283 the displacement of the FE models during the closure step (Fig 7A-C). The insertion of the  
284 IOM (interosseous membrane) ligament at the jaw joint generates a distinct peak in strain,  
285 which is located at the tip of the RAP in controls (Fig 7D, J, Fig S6A). This peak correlates  
286 with the position of *Col10a1* expressing osteoblasts; which are mechanically responsive and  
287 reduced in anaesthetised larvae (Fig 6). The mandibular symphysis is also a site of  
288 increased mechanical load in models of 5dpf control and recovered larvae (Fig7, D-E,J-K  
289 arrow head) but not the subluxed model. The orientation/direction of the principal strains  
290 within a tissue are important regulators of cell orientation. In the MC the orientation of  
291 maximum principal strain, as indicated by the direction of the arrows (Fig 7G-I), closely  
292 follows the curvature of the cartilage with a distinct peak at symphysis. Thus cells within the  
293 MC are orientated perpendicular to these strains. While the magnitude of the loads are  
294 reduced, relative to control, it is still possible to identify a distinct peak at the symphysis in  
295 the model of recovery which is absent in the subluxed (Fig 7I).

296 We identified distinct differences in the regional behaviour of cells between larvae that  
297 remain subluxed and those that successfully recover. FE modelling has been shown to  
298 predict changes to joint shape and cellular behaviour in the developing jaw joint [5]. We used  
299 the FE models to identify if larvae that recover also exhibit distinctly different patterns of  
300 biophysical stimuli. In controls, the medial side of the joint is highly loaded (Fig 7D, J, black  
301 arrowhead). Recovery is generated by a specific pattern of cell proliferation and migration  
302 that varies medial-laterally. In joints that recover there is a significant increase in both

303 proliferation and migration on the lateral side of recovering joints that is absent from those  
304 that remain subluxed. To determine if the magnitudes and pattern of loading differed  
305 between regions of the model we extracted the absolute maximum principal strain for 10  
306 nodes on the medial and lateral side of the joint (Fig 7M) and graphed the results (Fig 7N).  
307 In all three models the medial side experiences variable but negative absolute maximum  
308 strain indicating a dynamic compressive environment. In comparison, the lateral side of both  
309 control and recovered models oscillates between positive (tensional) and negative  
310 (compressive) strain while the subluxed surface remains under a lower magnitude negative  
311 (compressive) strain.

312

### 313 **Discussion**

314 Here, we present a novel zebrafish model of developmental joint dysplasia; characterising  
315 the cellular mechanisms underpinning the recovery of joint function in malformed joints.  
316 Immobilised joints lack the complex interlocking joint shape characteristic of synovial joints,  
317 which maintain joint position and range of motion, therefore recapitulating many of the  
318 features of DDH [8]. Here we demonstrate that the resumption of movement in immobilised  
319 zebrafish joints can be used to examine the impact of suboptimal joint shape on joint health,  
320 raising the prospect of following manipulated joints throughout the life of the individual.

321 The zebrafish jaw joint, between the MC and Palatoquadrate, was the focus of this study.  
322 This joint is synovial and can develop osteoarthritis [38] and has all the key features of  
323 mammalian skeleton including articular cartilage, joint cavity, synovium, tendon and  
324 ligaments [39,40]. The zebrafish also has a growing array of genetic tools [41] and is  
325 amenable to live imaging making it ideal for longitudinal studies. Tricaine immobilisation  
326 alters the shape of the jaw joint and MC by altering cell differentiation and proliferation [5,15]  
327 and is similar to the method used in the chick model of DDH [10]. Laser muscle ablation  
328 induced a similarly malformed jaw joint without the systemic issues associated with drug

329 treatments. We found a significant proportion of both the anaesthetised and ablated larvae  
330 could recover a normal jaw position and approximately normal joint shape while those that  
331 fail to recover remain subluxed and have a significantly different jaw shape, reflecting the  
332 variability seen in human cases of joint dysplasia.

333 DDH symptoms can range from a mild joint laxity that can resolve itself, up to full subluxation  
334 requiring reduction. Prognosis is correlated with severity of the malformation of the  
335 acetabulum and age of treatment [1]. We hypothesised, that within a similarly treated group,  
336 jaw joint shape would be an indicator of recovery. However, morphometric analysis indicated  
337 that the shape of the MC at 5dpf was a relatively poor indicator of likelihood of recovery. As  
338 a simplified 2D analysis was performed, it is possible that 3D aspects of the shape that might  
339 influence recovery were not captured by the analysis. The relationship between the shape  
340 and position of the palatoquadrate surface relative to the MC could play a substantial role in  
341 recovery and wasn't included in the morphometric analysis.

342 While shape alone could not predict which larvae would recover, chondrocyte behaviours at  
343 the mandibular symphysis and joint could. The orientation of cells in the joint is significantly  
344 disrupted by immobilisation [5]. At 5dpf, cells in the mandibular symphysis and jaw joint of  
345 larvae that remain subluxed were rounder and less differentiated than those that recover.  
346 Interestingly, by 7dpf cell orientation is corrected in all samples bar the *Myod* mutants. The  
347 larval response to immobilisation and recovery is a spectrum determined by differences in  
348 cell behaviour.

349 Embryonic immobilisation is associated with loss of the articular surfaces, joint fusion and  
350 the degeneration of structures such as meniscus and patella [33]. 5dpf immobilised larvae  
351 lost the definition of the interzone, which gives rise to the articular cartilage [42]. By 7dpf the  
352 anti-correlative relationship between *Sox10* and *Col2a1* expression in the interzone of  
353 recovered larva was redefined but remained abnormal in joints that fail to recover (subluxed  
354 and *Myod* mutants). The development of ligaments [6,33] and their insertion sites (Entheses)  
355 are particularly vulnerable to loss of mechanical stimulus [43]. In immobilised and ablated

356 larvae at 5dpf the interoperculo-mandibular ligament was wider and looser and ossification at  
357 the entheses was significantly reduced. By 7dpf recovery ameliorated this impact  
358 significantly. Thus, movement corrects not only the shape of the joint but also drives the  
359 recovery of vital joint associated structures.

360 Skeletal morphogenesis requires preferential regional growth, a feature lost during  
361 immobilisation. It is achieved by the local moderation of cell migration, proliferation, cell  
362 shape and matrix synthesis [33]. Cellular reorientation and shape change are a feature of  
363 recovery however immobilisation has been shown to alter patterns of cell proliferation [7,44].  
364 BrdU incorporation and Kaede photoconversion identified a specific pattern of cell  
365 proliferation, migration and growth on the lateral side of the joint that was only present in  
366 larvae that recover. These local differences in cell behaviour may be driven by specific  
367 biomechanical differences between recovered and subluxed larvae.

368 We developed Finite Element (FE) models based on 3D confocal datasets of control and  
369 anaesthetised larvae at 5dpf. The two chosen anaesthetised larvae were representative  
370 examples of those that recover and those that remain subluxed. We identified variations  
371 between the mechanical stimuli experienced by these anaesthetised larvae, which may in  
372 turn drive the restoration of normal joint shape and function. FE results suggest that cells in  
373 the Meckel's cartilage orientate themselves perpendicular to the main direction of strain and  
374 that this signal is stronger in larvae that successfully recover. This is in keeping with reports  
375 that cells align nearly perpendicular to dynamically varying stresses [45]. The  
376 mechanoregulation of chondro-progenitor and chondrocyte proliferation and biosynthesis  
377 has been extensively studied in a variety of culture system including explants and monolayer  
378 in response to a wide range of mechanical stimuli including compression, tension,  
379 hydrostatic pressure and fluid flow [46]. The response of cells to a particular load is  
380 dependent on the type of load, its mode of application i.e static or cyclic and the magnitude  
381 of this load. Cyclical loading of chondrocytes cultured in alginate beads had a positive effect  
382 on chondrocyte metabolism increasing cartilage matrix synthesis while static load was

383 degenerative[47]. Cyclical loading impacts the differentiation of cells, increasing Indian  
384 hedgehog expression and stimulating chondrocyte proliferation[19]. Stretch also stimulated  
385 the proliferation of immature chondrocytes, but not that of hypertrophic chondrocytes [48].  
386 Ultimately load appears to differentially regulate the behaviour of cells[18]. Thus  
387 morphogenesis is regulated through a combination of intrinsic regulatory signals produced  
388 by the tissue itself e.g. Wnt or Bmp signalling, and extrinsic signals produced by mechanical  
389 stimuli. These extrinsic stimuli will in turn alter the expression of intrinsic regulators creating  
390 a vicious circle of degeneration amplifying the original malformations. Thus the difference  
391 between success and failure may be initially quite minor but could be exacerbated by this  
392 “intrinsic-extrinsic” feedback loop. It also demonstrates that successful recovery is very  
393 dependent on the individual, their specific cellular orientation, joint shape and mechanical  
394 environment. This is corroborated by the long term prognosis of DDH which even after  
395 treatment is variable[49].

396 It is possible that higher vertebrates, which lack the regenerative capacity of zebrafish [50],  
397 would not respond as dramatically to the resumption of movement, though even in humans  
398 cases of DDH can resolve spontaneously with no intervention [1]. As skeletal plasticity is  
399 preserved in higher vertebrates we believe the zebrafish model could provide useful insight  
400 into the mechanism regulating this plasticity. Using either anaesthesia or muscle ablation it  
401 will be possible to target specific windows of plasticity during joint development and identify  
402 what processes are disrupted and ultimately determine how some larvae are better  
403 positioned for recovery, in the hope of identifying why the prognosis from some DDH  
404 patients is so severe.

## 405 **Materials and Methods**

### 406 **Zebrafish husbandry and lines.**

407 Zebrafish were housed as previously described [51]. Animal experiments were approved by  
408 Bristol University animal ethics committee and the UK Home Office. All transgenic and



409 mutant lines have been previously described: TgBAC(*col2a1a:mCherry*)<sup>hu5910</sup> [52]; Myod<sup>fh261</sup>  
410 [31]; Tg(-4725*sox10:GFP*)<sup>ba4</sup> [53]; *symhc:EGFP* [54]; Tg(*Sox10:Gal4-VP16*) [55];  
411 Tg(UAS:Kaede) [56]; TgBAC(*col10a1a:Citrine*)<sup>hu7050</sup> [57]. Sample numbers used are listed in  
412 supplementary S 3 Table.

### 413 **Pharmacological treatment and imaging**

414 Fish were treated for 24 hours beginning 72 hours post fertilisation (hpf) and 96hpf, 48 hrs  
415 from 72hpf, or 56 hours from 72hpf (Fig 1E) with 0.1mg/ml MS222 (Tricaine  
416 methanesulfonate)(Sigma), diluted in Danieau's buffer refreshed twice daily. Jaw position  
417 was assessed daily between 5 and 7dpf (Fig. 1C) and the percentage recovery calculated  
418 from at least 4 plates of 30 larvae. Tracked cohorts were imaged on 5 and 7dpf.

### 419 **Live imaging**

420 Larvae were sedated, embedded ventrally in 0.5% LMP agarose (Sigma) and fluorescence  
421 visualised on a Leica SP8 system using a 10x objective. After imaging larvae recovered in  
422 fresh Danieau's buffer.

### 423 **Muscle Ablation**

424 The Tg(*symhc:EGFP*) transgenic line was used to visualise muscle position. Anaesthetised  
425 3dpf larvae were mounted ventrally in 0.2% LMP agarose in Danieau's and adductor  
426 mandibulae (AM) muscles bilaterally ablated with a 440nm nitrogen Micropoint laser  
427 connected to a Zeiss Axioplan microscope. Ablation success was confirmed by imaging after  
428 ablation. As *symhc:eGFP* is expressed in slow fibres, the efficacy of laser ablation was  
429 verified in 3dpf fixed larvae using fluorescent immunohistochemistry [58] against GFP  
430 (ab13970 abcam, 1:200) and skeletal myosin (A4.1025 DSHB, 1:200) (S4 Fig).

### 431 **Jaw movement movies**

432 Movies were taken as previously described [5]. Larvae were imaged at 30msec per frame for  
433 500 frames and the number of mouth movements and jaw displacement was recorded.  
434 Results were analysed by Anova (SPSS).

#### 435 **Analysis of shape variation**

436 Changes to the Meckel's cartilage (MC) shape were quantified using two-dimensional (2D)  
437 geometric morphometrics [16]. Outlines of the MC of 5dpf and 7dpf controls, anaesthetised  
438 and ablated larva were digitised and analysed by non-parametric MANOVA (npManova) and  
439 between-groups Principal Components Analysis (bgPCA). The anaesthetised and ablated  
440 larvae were subdivided by the functional position of their jaw (subluxed or recovered) at  
441 7dpf.

#### 442 **Cell orientation, area and shape**

443 Separate Z-projections of 2-3 consecutive slices were created from *Col2a1* labelled images  
444 of the MC through the mandibular symphysis and jaw joint. Cell area and the circularity of a  
445 minimum of 10 cells between the insertion points of the intermandibularis anterior muscle  
446 were analysed [16]. Cell orientation and area were measured for a minimum of 6 joints per  
447 condition at 5 and 7dpf [5]. Chondrocytes were subdivided into those located within 3 cell  
448 widths of the medial or lateral side of the joint. Graphs were produced and analysed using  
449 PAST [59] and PRISM (Version 7).

#### 450 **Sox10 Col2a1 colocalisation**

451 Larvae carrying *Col2a1:mcherry* and *sox10:GFP* transgenes were anaesthetised for 48hrs  
452 from 3dpf, allowed to recover, imaged at 5 and 7dpf and processed using a custom MATLAB  
453 tool. Stacks were binarised using a threshold to remove background noise. The product of  
454 difference from mean (PDM) of each image was calculated [35]. In this data positive values  
455 correspond to correlation and negative to anti-correlation between the expression of *Sox10*  
456 and *Col2a1*, after each has been normalised by average brightness. The anti-correlation  
457 dataset was transformed to a positive image, the joint region selected in 2D and the

458 boundary projected across all slices of the image stack. Within each boundary, pixels above  
459 the intensity threshold were fit with an alpha shape [60] yielding a measure of the enclosed  
460 volume.

#### 461 **Kaede protein photoconversion**

462 Control and anaesthetised double transgenic Tg(*Sox10:GAL4-VP16*) Tg(UAS:Kaede) larvae  
463 were mounted ventrally at 5dpf and 8-10 Kaede expressing cells on the medial or lateral side  
464 of the joint were photoconverted [58]. Following photoconversion, larvae were kept  
465 individually, reimaged at 7dpf and jaw position assessed. Maximum projections of the red  
466 channel were prepared [61] and the area of the photoconverted region was calculated  
467 before and after recovery.

#### 468 **BrdU immunostaining**

469 Control and 48hrs anaesthetised larvae were treated with 3mM BrdU (Sigma) diluted in  
470 Danieau's solution from 5-7dpf. BrdU incorporation was visualised by immunohistochemistry  
471 [58] using mouse anti-BrdU (Sigma, 1:100) and rabbit anti-collagen II (Abcam, 1:200), prior  
472 to imaging on confocal SP8. BrdU positive cells within the jaw joint cartilage, were counted  
473 and divided into the medial and lateral side of the joint.

#### 474 **Finite Element Modelling**

475 Representative confocal images of 5dpf recovered and subluxed larvae expressing  
476 *Col2a1:mcherry* were converted into 3D finite element models for comparison with  
477 previously published 5dpf control models using Hypermesh (Version 10, Altair Engineering)  
478 [5]. All models had a Young's modulus of 1.1 MPa for the cartilage and 0.75MPa for the  
479 interzone and mandibular symphysis, and Poisson's ratio of 0.25 [as described in 5]. Muscle  
480 attachments were added to the FE-models for mouth closure (adductor mandibulae) and  
481 opening (protractor hyoideus and intermandibularis) using confocal datasets for reference for  
482 attachment sites (Fig S5 A,C,E, O-Q, Table S5). Spring elements were used to simulate the  
483 Interoperculomandibular ligament (Fig S5, O-Q, S4 Table) [7]. Anaesthesia impacts the

484 function of both the muscle and ligaments. In the chick Immobilisation causes to a reduction  
485 in muscle size and its ability to transmit forces [62,63]. The magnitudes of the forces applied  
486 to the model were therefore adjusted to 75% of the normal estimation [derived from 63].  
487 Immobilisation of the mouse cruciate ligament also reduced its stiffness and peak force[64].  
488 The stiffness of the spring was reduced to 75% (1.3E-0.4 kN/mm). Immobilisation disrupts  
489 the definition of the interzone. While a clear interzone could be identified in control and  
490 recovered images it was not possible to identify a clear interzone spanning the joint space in  
491 the subluxed dataset, therefore the joint was modelled as a fusion with a collar of interzone  
492 (Fig S5 O). The geometrically linear models of approximately 2 million tetrahedral elements  
493 were imported from into Abaqus FE-software (v6.14 Simulia, Dassault Systèmes), the spring  
494 elements were assigned and the model was analysed (v6.10.2 Simulia, Dassault Systèmes).

#### 495 **Acknowledgments**

496 The authors would like to thank the Wolfson Bioimaging Centre, Jen Bright and David  
497 Gurevich for their technical advice and support.

498 .

499

500

501

502 **References**

- 503 1. Dezateux C, Rosendahl K Developmental dysplasia of the hip. *The Lancet* 369: 1541-1552.
- 504 2. Chan A, McCaul KA, Cundy PJ, Haan EA, Byron-Scott R (1997) Perinatal risk factors for  
505 developmental dysplasia of the hip. *Archives of Disease in Childhood - Fetal and*  
506 *Neonatal Edition* 76: F94-F100.
- 507 3. Haverkamp DJ, Schiphof D, Bierma-Zeinstra SM, Weinans H, Waarsing JH (2011) Variation  
508 in joint shape of osteoarthritic knees. *Arthritis & Rheumatism* 63: 3401-3407.
- 509 4. Neogi T, Bowes MA, Niu J, De Souza KM, Vincent GR, et al. (2013) Magnetic Resonance  
510 Imaging–Based Three-Dimensional Bone Shape of the Knee Predicts Onset of Knee  
511 Osteoarthritis: Data From the Osteoarthritis Initiative. *Arthritis & Rheumatism* 65:  
512 2048-2058.
- 513 5. Brunt LH, Norton JL, Bright JA, Rayfield EJ, Hammond CL (2015) Finite element modelling  
514 predicts changes in joint shape and cell behaviour due to loss of muscle strain in jaw  
515 development. *J Biomech* 48: 3112-3122.
- 516 6. Roddy KA, Prendergast PJ, Murphy P (2011) Mechanical influences on morphogenesis of  
517 the knee joint revealed through morphological, molecular and computational  
518 analysis of immobilised embryos. *PLoS One* 6: e17526.
- 519 7. Roddy KA, Kelly GM, van Es MH, Murphy P, Prendergast PJ (2011) Dynamic patterns of  
520 mechanical stimulation co-localise with growth and cell proliferation during  
521 morphogenesis in the avian embryonic knee joint. *J Biomech* 44: 143-149.
- 522 8. Nowlan NC, Bourdon C, Dumas G, Tajbakhsh S, Prendergast PJ, et al. (2010) Developing  
523 bones are differentially affected by compromised skeletal muscle formation. *Bone*  
524 46: 1275-1285.
- 525 9. Murray PD, Drachman DB (1969) The role of movement in the development of joints and  
526 related structures: the head and neck in the chick embryo. *J Embryol Exp Morphol*  
527 22: 349-371.
- 528 10. Nowlan NC, Chandaria V, Sharpe J (2014) Immobilized chicks as a model system for  
529 early-onset developmental dysplasia of the hip. *J Orthop Res* 32: 777-785.
- 530 11. Mikic B, Johnson TL, Chhabra AB, Schalet BJ, Wong M, et al. (2000) Differential effects of  
531 embryonic immobilization on the development of fibrocartilaginous skeletal  
532 elements. *J Rehabil Res Dev* 37: 127-133.
- 533 12. Osborne AC, Lamb KJ, Lewthwaite JC, Dowthwaite GP, Pitsillides AA (2002) Short-term  
534 rigid and flaccid paralyses diminish growth of embryonic chick limbs and abrogate  
535 joint cavity formation but differentially preserve pre-cavitated joints. *J Musculoskelet*  
536 *Neuronal Interact* 2: 448-456.
- 537 13. Rolfe RA, Nowlan NC, Kenny EM, Cormican P, Morris DW, et al. (2014) Identification of  
538 mechanosensitive genes during skeletal development: alteration of genes associated  
539 with cytoskeletal rearrangement and cell signalling pathways. *BMC Genomics* 15: 48.
- 540 14. Nowlan NC, Dumas G, Tajbakhsh S, Prendergast PJ, Murphy P (2012) Biophysical stimuli  
541 induced by passive movements compensate for lack of skeletal muscle during  
542 embryonic skeletogenesis. *Biomech Model Mechanobiol* 11: 207-219.
- 543 15. Shwartz Y, Farkas Z, Stern T, Aszodi A, Zelzer E (2012) Muscle contraction controls  
544 skeletal morphogenesis through regulation of chondrocyte convergent extension.  
545 *Dev Biol* 370: 154-163.
- 546 16. Brunt LH, Skinner REH, Roddy KA, Araujo NM, Rayfield EJ, et al. (2016) Differential  
547 effects of altered patterns of movement and strain on joint cell behaviour and  
548 skeletal morphogenesis. *Osteoarthritis and Cartilage* 24: 1940-1950.

- 549 17. Smith RL, Carter DR, Schurman DJ (2004) Pressure and Shear Differentially Alter Human  
550 Articular Chondrocyte Metabolism: A Review. *Clinical Orthopaedics and Related*  
551 *Research* 427: S89-S95.
- 552 18. Wong M, Siegrist M, Goodwin K (2003) Cyclic tensile strain and cyclic hydrostatic  
553 pressure differentially regulate expression of hypertrophic markers in primary  
554 chondrocytes. *Bone* 33: 685-693.
- 555 19. Wu Q-q, Zhang Y, Chen Q (2001) Indian hedgehog Is an Essential Component of  
556 Mechanotransduction Complex to Stimulate Chondrocyte Proliferation. *Journal of*  
557 *Biological Chemistry* 276: 35290-35296.
- 558 20. Burleigh A, Chanalaris A, Gardiner MD, Driscoll C, Boruc O, et al. (2012) Joint  
559 immobilization prevents murine osteoarthritis and reveals the highly  
560 mechanosensitive nature of protease expression in vivo. *Arthritis & Rheumatism* 64:  
561 2278-2288.
- 562 21. Intema F, Van Roermund PM, Marijnissen ACA, Cotofana S, Eckstein F, et al. (2011)  
563 Tissue structure modification in knee osteoarthritis by use of joint distraction: an  
564 open 1-year pilot study. *Annals of the Rheumatic Diseases*.
- 565 22. Watt FE, Kennedy DL, Carlisle KE, Freidin AJ, Szydlo RM, et al. (2014) Night-time  
566 immobilization of the distal interphalangeal joint reduces pain and extension  
567 deformity in hand osteoarthritis. *Rheumatology* 53: 1142-1149.
- 568 23. Ando A, Suda H, Hagiwara Y, Onoda Y, Chimoto E, et al. (2011) Reversibility of  
569 immobilization-induced articular cartilage degeneration after remobilization in rat  
570 knee joints. *Tohoku J Exp Med* 224: 77-85.
- 571 24. Bartolomé N, Segarra S, Artieda M, Francino O, Sánchez E, et al. (2015) A Genetic  
572 Predictive Model for Canine Hip Dysplasia: Integration of Genome Wide Association  
573 Study (GWAS) and Candidate Gene Approaches. *PLOS ONE* 10: e0122558.
- 574 25. Vanden Berg-Foels WS, Todhunter RJ, Schwager SJ, Reeves AP (2006) Effect of Early  
575 Postnatal Body Weight on Femoral Head Ossification Onset and Hip Osteoarthritis in  
576 a Canine Model of Developmental Dysplasia of the Hip. *Pediatr Res* 60: 549-554.
- 577 26. Bo N, Peng W, Xinghong P, Ma R (2012) Early Cartilage Degeneration in a Rat  
578 Experimental Model of Developmental Dysplasia of the Hip. *Connective Tissue*  
579 *Research* 53: 513-520.
- 580 27. Greenhill BJ, Hainau B, Ellis RD, el-Sayed RM (1995) Acetabular changes in an  
581 experimental model of developmental dysplasia of the hip (DDH). *J Pediatr Orthop*  
582 15: 789-793.
- 583 28. Askary A, Mork L, Paul S, He X, Izuhara AK, et al. (2015) Iroquois Proteins Promote  
584 Skeletal Joint Formation by Maintaining Chondrocytes in an Immature State. *Dev Cell*  
585 35: 358-365.
- 586 29. Hayes AJ, Reynolds S, Nowell MA, Meakin LB, Habicher J, et al. (2013) Spinal deformity in  
587 aged zebrafish is accompanied by degenerative changes to their vertebrae that  
588 resemble osteoarthritis. *PLoS One* 8: e75787.
- 589 30. Curado S, Anderson RM, Jungblut B, Mumm J, Schroeter E, et al. (2007) Conditional  
590 targeted cell ablation in zebrafish: A new tool for regeneration studies.  
591 *Developmental Dynamics* 236: 1025-1035.
- 592 31. Hinits Y, Williams VC, Sweetman D, Donn TM, Ma TP, et al. (2011) Defective cranial  
593 skeletal development, larval lethality and haploinsufficiency in Myod mutant  
594 zebrafish. *Dev Biol* 358: 102-112.

- 595 32. Kronenberg HM (2003) Developmental regulation of the growth plate. *Nature* 423: 332-  
596 336.
- 597 33. Shwartz Y, Blitz E, Zelzer E (2013) One load to rule them all: Mechanical control of the  
598 musculoskeletal system in development and aging. *Differentiation* 86: 104-111.
- 599 34. Dutton KA, Pauliny A, Lopes SS, Elworthy S, Carney TJ, et al. (2001) Zebrafish colourless  
600 encodes sox10 and specifies non-ectomesenchymal neural crest fates. *Development*  
601 128: 4113-4125.
- 602 35. Li Q, Lau A, Morris TJ, Guo L, Fordyce CB, et al. (2004) A Syntaxin 1,  $G\alpha_o$ , and N-Type  
603 Calcium Channel Complex at a Presynaptic Nerve Terminal: Analysis by Quantitative  
604 Immunocolocalization. *The Journal of Neuroscience* 24: 4070-4081.
- 605 36. Persson M (1983) The role of movements in the development of sutural and diarthrodial  
606 joints tested by long-term paralysis of chick embryos. *J Anat* 137 (Pt 3): 591-599.
- 607 37. Eames BF, Amores A, Yan Y-L, Postlethwait JH (2012) Evolution of the osteoblast:  
608 skeletogenesis in gar and zebrafish. *BMC Evolutionary Biology* 12: 27.
- 609 38. Askary A, Smeeton J, Paul S, Schindler S, Braasch I, et al. (2016) Ancient origin of  
610 lubricated joints in bony vertebrates. *eLife* 5: e16415.
- 611 39. Chen JW, Galloway JL (2014) The development of zebrafish tendon and ligament  
612 progenitors. *Development* 141: 2035-2045.
- 613 40. Smeeton J, Askary A, Crump JG (2017) Building and maintaining joints by exquisite local  
614 control of cell fate. *Wiley Interdisciplinary Reviews: Developmental Biology* 6: e245-  
615 n/a.
- 616 41. Hammond CL, Moro E (2012) Using transgenic reporters to visualize bone and cartilage  
617 signaling during development in vivo. *Front Endocrinol (Lausanne)* 3: 91.
- 618 42. Koyama E, Shibukawa Y, Nagayama M, Sugito H, Young B, et al. (2008) A distinct cohort  
619 of progenitor cells participates in synovial joint and articular cartilage formation  
620 during mouse limb skeletogenesis. *Developmental Biology* 316: 62-73.
- 621 43. Solem RC, Eames BF, Tokita M, Schneider RA (2011) Mesenchymal and mechanical  
622 mechanisms of secondary cartilage induction. *Developmental Biology* 356: 28-39.
- 623 44. Pollard AS, Charlton BG, Hutchinson JR, Gustafsson T, McGonnell IM, et al. (2017) Limb  
624 proportions show developmental plasticity in response to embryo movement.  
625 *Scientific Reports* 7: 41926.
- 626 45. De R, Zemel A, Safran SA (2007) Dynamics of cell orientation. *Nat Phys* 3: 655-659.
- 627 46. McMahan LA, O'Brien FJ, Prendergast PJ (2008) Biomechanics and mechanobiology in  
628 osteochondral tissues. *Regenerative Medicine* 3: 743-759.
- 629 47. Sharma G, Saxena RK, Mishra P (2007) Differential effects of cyclic and static pressure on  
630 biochemical and morphological properties of chondrocytes from articular cartilage.  
631 *Clinical Biomechanics* 22: 248-255.
- 632 48. Wu Q-q, Chen Q (2000) Mechanoregulation of Chondrocyte Proliferation, Maturation,  
633 and Hypertrophy: Ion-Channel Dependent Transduction of Matrix Deformation  
634 Signals. *Experimental Cell Research* 256: 383-391.
- 635 49. Jacobsen S, Sonne-Holm S (2005) Hip dysplasia: a significant risk factor for the  
636 development of hip osteoarthritis. A cross-sectional survey. *Rheumatology* 44: 211-  
637 218.
- 638 50. Gemberling M, Bailey TJ, Hyde DR, Poss KD (2013) The zebrafish as a model for complex  
639 tissue regeneration. *Trends in Genetics* 29: 611-620.
- 640 51. Westerfield M (2000) *The zebrafish book. A guide for the laboratory use of zebrafish*  
641 (Danio rerio). Univ. of Oregon Press, Eugene

- 642 52. Hammond CL, Schulte-Merker S (2009) Two populations of endochondral osteoblasts  
643 with differential sensitivity to Hedgehog signalling. *Development* 136: 3991-4000.
- 644 53. Dutton JR, Antonellis A, Carney TJ, Rodrigues FS, Pavan WJ, et al. (2008) An  
645 evolutionarily conserved intronic region controls the spatiotemporal expression of  
646 the transcription factor Sox10. *BMC Dev Biol* 8: 105.
- 647 54. Elworthy S, Hargrave M, Knight R, Mebus K, Ingham PW (2008) Expression of multiple  
648 slow myosin heavy chain genes reveals a diversity of zebrafish slow twitch muscle  
649 fibres with differing requirements for Hedgehog and Prdm1 activity. *Development*  
650 135: 2115-2126.
- 651 55. Lee RTH, Knapik EW, Thiery JP, Carney TJ (2013) An exclusively mesodermal origin of fin  
652 mesenchyme demonstrates that zebrafish trunk neural crest does not generate  
653 ectomesenchyme. *Development* 140: 2923-2932.
- 654 56. Hatta K, Tsujii H, Omura T (2006) Cell tracking using a photoconvertible fluorescent  
655 protein. *Nat Protocols* 1: 960-967.
- 656 57. Mitchell RE, Huitema LF, Skinner RE, Brunt LH, Severn C, et al. (2013) New tools for  
657 studying osteoarthritis genetics in zebrafish. *Osteoarthritis Cartilage* 21: 269-278.
- 658 58. Brunt LH, Begg K, Kague E, Cross S, Hammond CL (2017) Wnt Signalling Controls the  
659 Response to Mechanical Loading during Zebrafish Joint Development. *bioRxiv*.
- 660 59. Hammer O, Harper DAT, Ryan PD (2001) Paleontological statistics software package for  
661 education and data analysis. *Paleontologia Electronica* 4: 9.
- 662 60. Edelsbrunner H, Kirkpatrick D, Seidel R (1983) On the shape of a set of points in the  
663 plane. *IEEE Transactions on Information Theory* 29: 551-559.
- 664 61. Schindelin J, Arganda-Carreras I, Frise E, Kaynig V, Longair M, et al. (2012) Fiji: an open-  
665 source platform for biological-image analysis. *Nat Meth* 9: 676-682.
- 666 62. Hall BK, Herring SW (1990) Paralysis and growth of the musculoskeletal system in the  
667 embryonic chick. *J Morphol* 206: 45-56.
- 668 63. Reiser PJ, Stokes BT, Walters PJ (1988) Effects of immobilization on the isometric  
669 contractile properties of embryonic avian skeletal muscle. *Experimental Neurology*  
670 99: 59-72.
- 671 64. Maeda T, Sakabe T, Sunaga A, Sakai K, Rivera Alexander L, et al. (2011) Conversion of  
672 Mechanical Force into TGF- $\beta$ -Mediated Biochemical Signals. *Current Biology* 21: 933-  
673 941.

674

675

## 676 **Figure legends**

677 Fig 1. Restoration of muscle contraction is sufficient to drive the recovery of jaw function and  
678 shape.

679 Zebrafish expressing Tg(*Col2a1aBAC:mcherry*) were imaged laterally (1,2) and ventrally (3-  
680 4) at 5dpf (A-C) and 7 dpf (E-I). Immobilisation and ablation caused joint subluxation  
681 (arrows, B1-2, C1-2) and flattening of mandibular symphysis (ms, B3-4, C3-4). The number



682 of mouth openings per 500 frames at 5dpf in anaesthetised larvae, after wash out, and  
683 ablated larvae (D) analysed by 2-way anova. 7dpf anaesthetised and ablated larva  
684 subdivided by jaw position (F-I). Time course of percentage recovery following varying  
685 anaesthesia treatment analysed using Kruskal-Wallis test (K). (a)  $p=0.009$  “24hrs 3-4” vs “48  
686 hrs”, (b)  $p=0.008$  “24 hrs 3-4” vs “24 hrs 4-5”, (c)  $p=0.049$  “24hrs 3-4” vs “56 hrs” and (d)  
687  $p=0.002$  “24hrs 3-4” vs “56 hrs”. m; Meckel’s cartilage, ch; ceratohyal, pq; palatoquadrate,  
688 RAP; retro-articular process.

689 Fig 2. Shape cannot be used to predict recovery in anaesthetised or ablated larvae however  
690 restored movement significantly altered the shape of the Meckel’s cartilage by 7dpf.

691 Graphic representation of results of npManova (B, C) of 2D outline of  
692 Tg(*Col2a1aBac:mcherry*) larvae (A). Principal component analysis of 5 (D) and 7dpf (E)  
693 treatment grouped by colour and subdivided by jaw position at 7dpf. Selected joint examples  
694 arranged according to PC1 and 2 at 5 dpf (F) and 7dpf (G) showing the increasing thickness  
695 of the MC (double arrow), overlapping joint shape (arrow) and altered curvature of the  
696 cartilage (PC2, double arrow).

697 Fig 3. Chondrocyte maturation is less affected in the mandibular symphysis and jaw joint of  
698 larvae that recover.

699 Confocal images of the mandibular symphysis of 5dpf and 7dpf control, *myod*<sup>-/-</sup>,  
700 anaesthetised and ablated zebrafish cartilage visualised using the Tg(*Col2a1aBAC:mcherry*)  
701 transgenic line (A-J). Confocal image of a representative jaw joint (O). Cell circularity (K, L)  
702 and cell area (M, N, P, Q) of 10 cells, outlined in red, between the insertion of the  
703 intermandibularis muscle ( $n=6$  per condition) (A-N) and below intercalation in the joint (O).  
704 1.00 represents a perfect circle.

705 Fig 4. Restored movement drives the restoration of the joint line.

706 Ventrally imaged zebrafish expressing Tg(*Col2a1aBAC:mcherry*) and Tg(-  
707 *4725sox10:GFP*)<sup>ba4</sup> at 3, 5 and 7dpf and laterally at 3 and 5dpf. High magnification confocal

708 images of the joint line of 5dpf (B) and 7dpf (C). Ablated and anaesthetised larvae which  
709 were subdivided by their jaw position at 7dpf. Joint volume (D, E) derived from the “product  
710 of the difference of the mean” (PDM) of the joint (white box). JL; joint line, SymI; mandibular  
711 symphysis PQ; palatoquadrate, mc; Meckel's cartilage, Ch; ceratohyal.

712 Fig 5. Cell proliferation and migration is differentially regulated in zebrafish that recover  
713 relative to those that remain subluxed.

714 BrdU incorporation (green) between 5-7dpf (A). Arrows show BrdU+ cells within the  
715 cartilage. Arrowhead shows BrdU+ incorporation outside the cartilage. Cells expressing  
716 Tg(Sox10:GAL4-VP16) and Tg(UAS:Kaede) are green until photoconverted. Red  
717 photoconverted cells located on the medial or lateral sides of the joint at 5dpf (left panels),  
718 reimaged at 7dpf (middle) with detail of photoconverted cells (right). Arrowhead indicates  
719 migration, p indicates proliferation. Number BrdU+ cells on the medial and lateral side of the  
720 joint in control, anaesthetised recovered and subluxed zebrafish. Fold change in total area of  
721 cells (red outline in B) expressing photoconverted red kaede in control, anaesthetised  
722 recovered and subluxed. The impact of side and treatment on BrdU+ counts and Kaede  
723 growth analysed by MANOVA.

724 Fig 6. Recovery restores joint associated structures.

725 Confocal images of control and anaesthetised TgBAC(Col10a1a:Citrine)<sup>hu7050</sup> and  
726 Tg(Col2a1aBAC:mcherry) were imaged ventrally at 5dpf (A-B'') and again at 7dpf (A-G''). At  
727 7dpf they were split into recovered and subluxed by jaw position. Detail images of RAP (')  
728 and RAP rotated approximately 90° ("). Counts of ColX expressing osteoblasts located at the  
729 RAP (arrows in detail images) at 5dpf (C) and 7dpf (H). Width of the Interoperculomandibular  
730 ligament (IOM), measured at 3 sites along the ligament at 5dpf (D) and 7dpf (I). Counts of  
731 BrdU incorporation into the IOM between 5dpf and 7dpf, prepared within 40µm of its  
732 insertion into the RAP in control and anaesthetised larvae split by jaw position at 7dpf (J-K).  
733 Analysed by Anova.

734 Fig 7. Finite element (FE) analysis reveals distinct differences between the patterns of  
735 biophysical stimuli

736 FE model simulating jaw displacement during closure in models of a 5 dpf control and anaesthetised  
737 larvae that recover (B) or remain subluxed (C). Displacement is shown as the block colour model  
738 relative to the semi-transparent model of the jaw original position, with the direction of motion  
739 indicated as an arrow. Finite element models of maximum principal strain created from confocal  
740 stacks of 5 dpf control (D,G, J) and anaesthetised larvae that recovered (E,H, K) or remained  
741 subluxed (F,I,L) during closure (D-I) and opening (J-L). Each panel shows a ventral view, enlarged  
742 image of the joint (Jj) and mandibular symphysis (MS). Strain was elevated at the symphysis (green  
743 arrowhead), RAP (red arrow) and on the lateral side of the joint (black arrow heads) (D-F, J-L). The  
744 orientation and magnitude of the strains are indicated by the direction, size and colour of arrows in the  
745 plane through the mandibular symphysis (G-I). Graph of the average absolute maximum principal  
746 strain during opening and closure (N), extracted from 10 elements on the medial and lateral side of  
747 the joint in a plane located at the midpoint of the joint (redline M).

748 *Supplementary Figures:*

749 S1 Fig. Muscle repair post ablation. *Smyhc:egfp* and *Col2a1:mcherry* transgenic zebrafish  
750 were bilaterally ablated at 3dpf and imaged at 4dpf and 5dpf. Yellow arrowhead indicate  
751 ablation site and repairing muscle.

752 S2 Fig. Cell orientations on the medial (A, green cells) and lateral (A, red cells) in wild type,  
753 anaesthetised recovered and subluxed and *myod*<sup>-/-</sup> and bilaterally ablated zebrafish jaw  
754 joints. Orientation angle, calculated from the longest axis of the cell (A, insert) of  
755 chondrocytes 5dpf (B) and 7dpf (C) zebrafish in the Meckel's cartilage element of the joint,  
756 plotted on circular histograms (rose plots), where 0° lies on the medial side of the joint and  
757 180° at the lateral side of the joint. n=6 joints per experimental condition (1 or 2 refers to  
758 number of joints per blue wedge). Histogram bins equal 20°. The red line marks mean  
759 orientation and the green line marks the 95% confidence interval and analysed by MANOVA.

760 S3 Fig. Differential expression of *Sox10: GFP* and *Col2a1:mCherry* is lost in the joints of *Myod-*  
761 *-/-* zebrafish. The intensity of product of the difference of the mean (PDM) between *Sox10: GFP*  
762 and *Col2a1:mCherry* double transgenic in control, anaesthetised recovered and sublaxed,  
763 *Myod* mutants and double ablated zebra fish.

764 S4 Fig. Muscle fibres numbers reduced after ablation. Confocal images of control (A,C,E)  
765 and adductor mandibularis (AM) ablated (B,D,F) transgenic *smyhc;EGFP* (A-B) zebrafish  
766 following immunohistochemistry for total Myosin (C-D) show significant reduction in the  
767 reduction in the number of fibres (G). Percentage of Fish divided by the success of ablation  
768 (H). Arrowhead indicates adductor mandibularis.

769 S5 Fig. Building Finite element (FE) models.

770 3D surfaces were generated from confocal images of 5dpf *Smyhc:egfp* and *Col2a1:mCherry*  
771 control (A) and anaesthetised larvae (C,E) were used to generate FE models (O-Q).  
772 Anaesthetised larvae were subdivided by their jaw position at 7dpf (C, E). By 7dpf the  
773 recovered larva (F) was significantly different in shape to the sublaxed (D). Sections through  
774 the jaw joint (J,K,N indicated by white line) show a continuous interzone in the joint (J', N',  
775 arrowhead) and mandibular symphysis (MS) (G, I, arrowhead) of controls and the recovered  
776 larva at 5dpf but not the sublaxed. A spring modelled the Interoperculomandibular ligament  
777 (IOM) between the retro articular process (RAP) and Hyoid bone (P-R, yellow line). 50% of  
778 maximum muscle loads (measured in Newtons (N)) were applied at the origin and insertion of the  
779 muscle. The adductor mandibularis (AM) (O',P',Q', blue line) was applied to model mouth closure. To  
780 capture the wider insertion of the intermandibularis (IM) and protractor hyoideus (PH) (O) the forces  
781 were applied across 10 nodes to model of mouth opening (O''-Q''). White dots indicate the area of  
782 applied constraints in either the x,y, or z orientation (O).

783

784 S6 Fig. Finite element (FE) models of minimum principal strain ( $E_{min}$ ).

785 Finite element models of minimum principal strain (compressive) created from confocal stacks of 5 dpf  
786 control (A,D) and anaesthetised larvae that recovered (B, E) or remained subluxed (C,F) during  
787 closure (A-C) and opening (D-F). Each panel shows a ventral view, enlarged image of the joint (Jj)  
788 and mandibular symphysis (MS). Strain was elevated RAP (red arrow).

789

790 S1 Video. Movie of jaw movement at 5dpf control larvae expressing *Col2a1:mcherry*.

791 S2 Video. Movie of jaw movement at 5dpf anaesthetised larvae expressing *Col2a1:mcherry*.

792 S3 Video. Movie of jaw movement at 5dpf in double ablated larvae expressing

793 *Col2a1:mcherry*

794

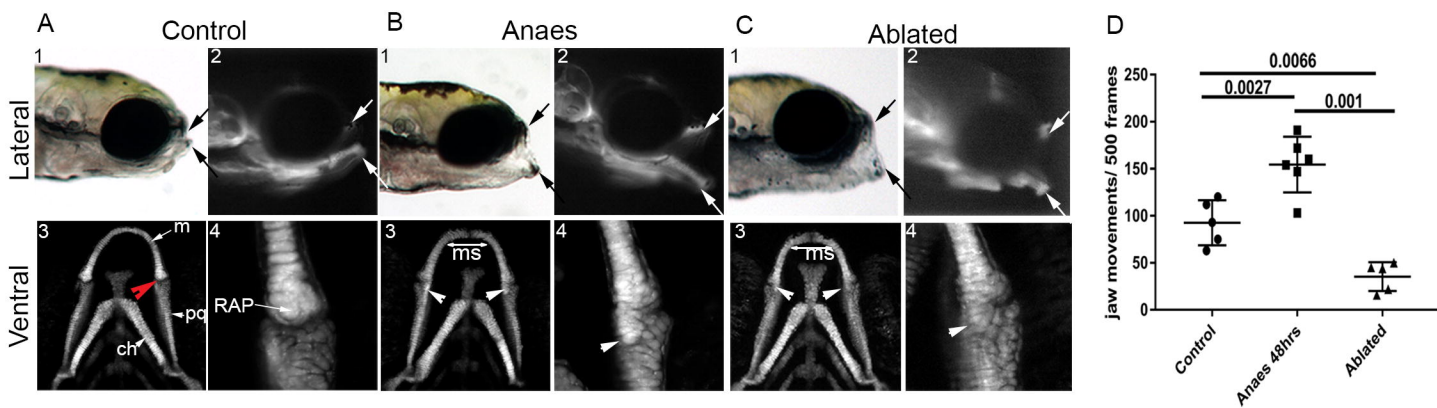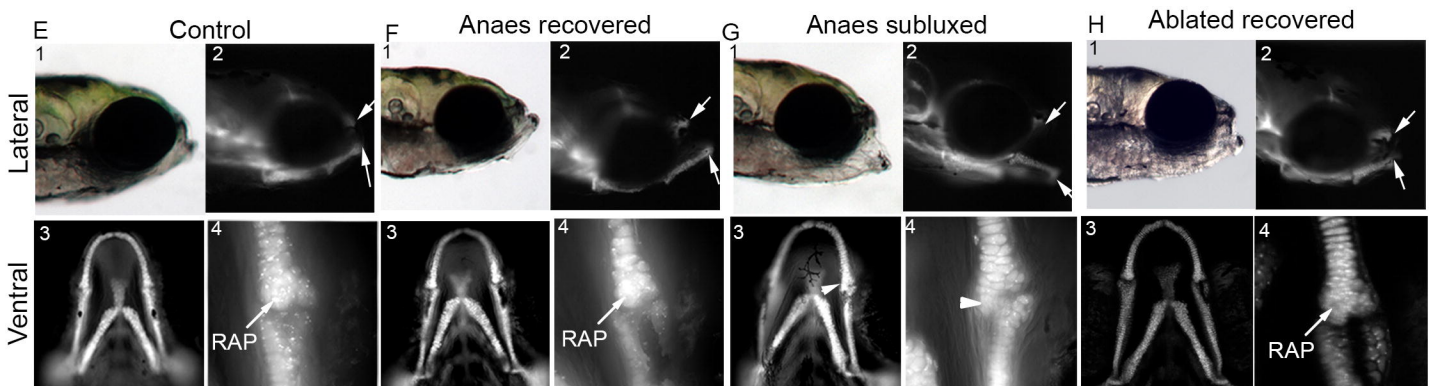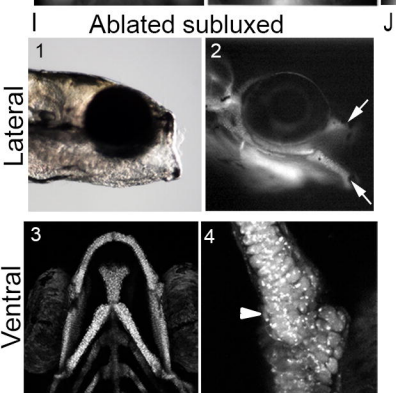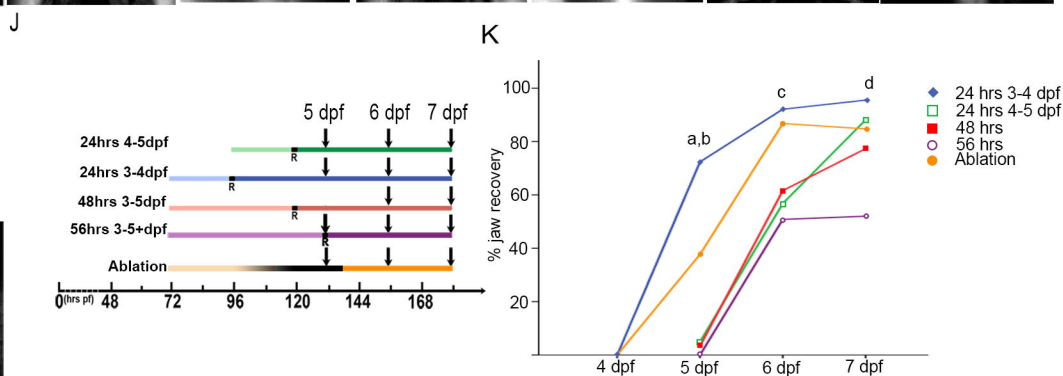

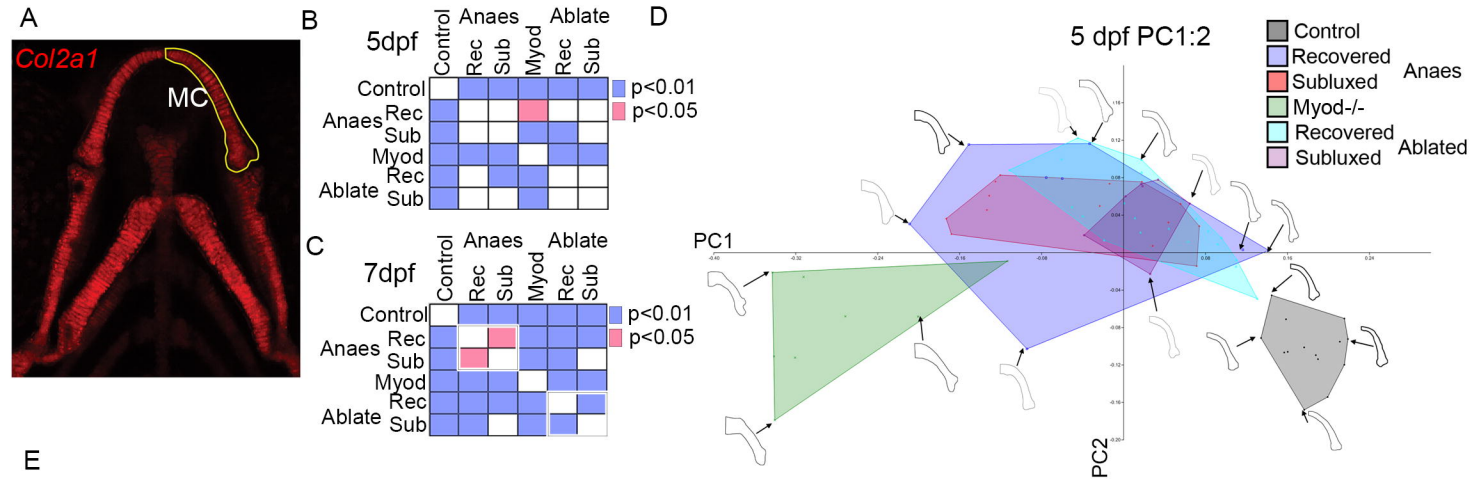

**E**

7 dpf PC1:2

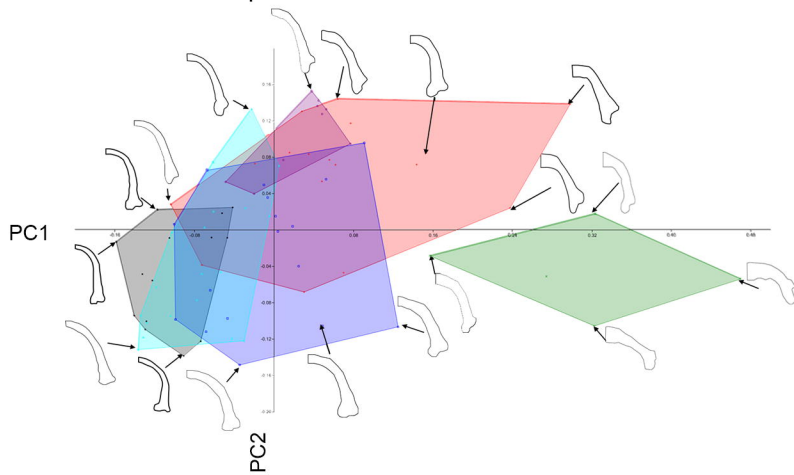

**F**

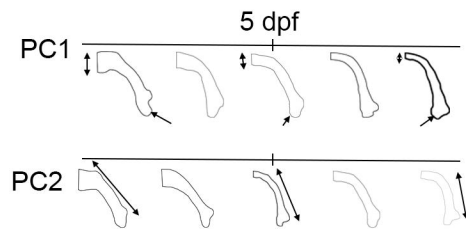

**G**

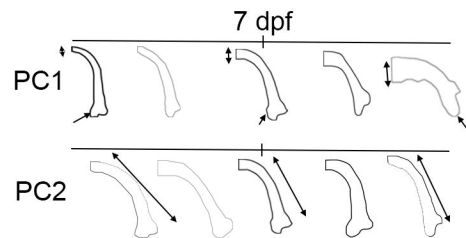

Control  
Subluxed  
Recovered  
MyoD<sup>-/-</sup>  
Ablated

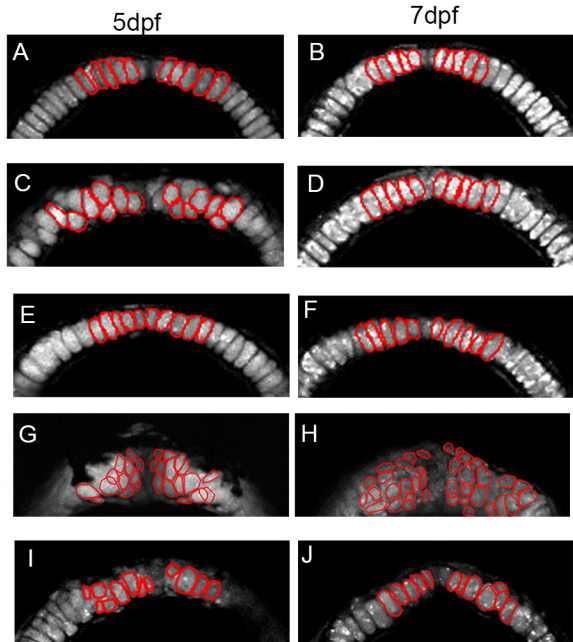

O

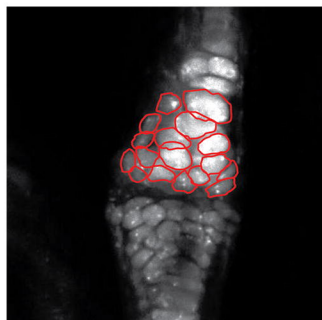

P

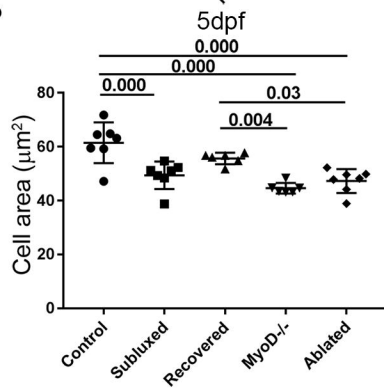

5dpf

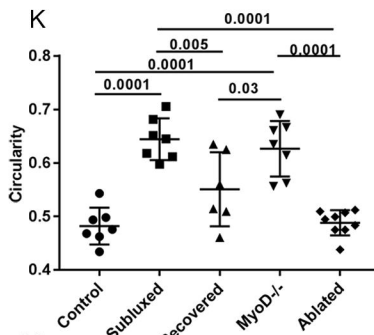

M

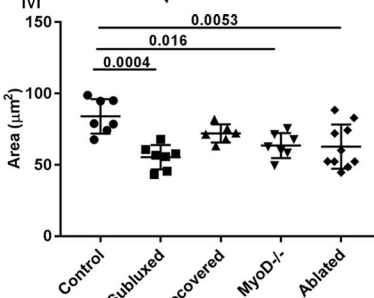

7dpf

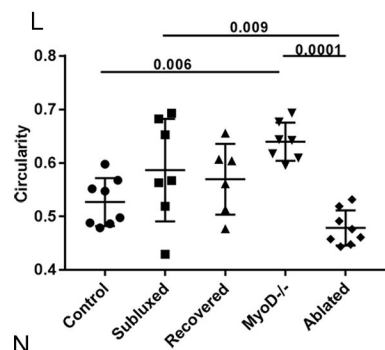

N

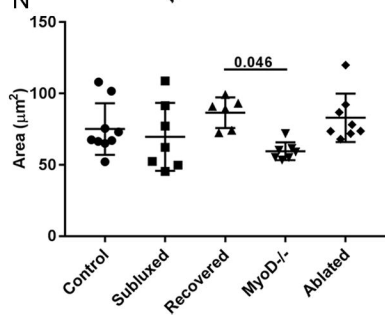

Q

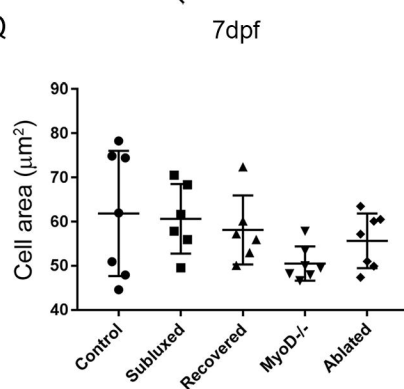



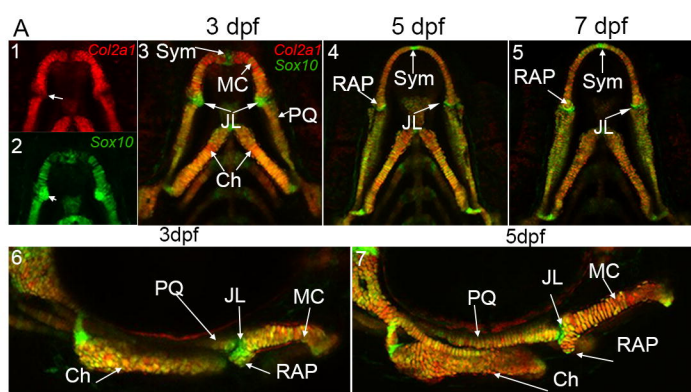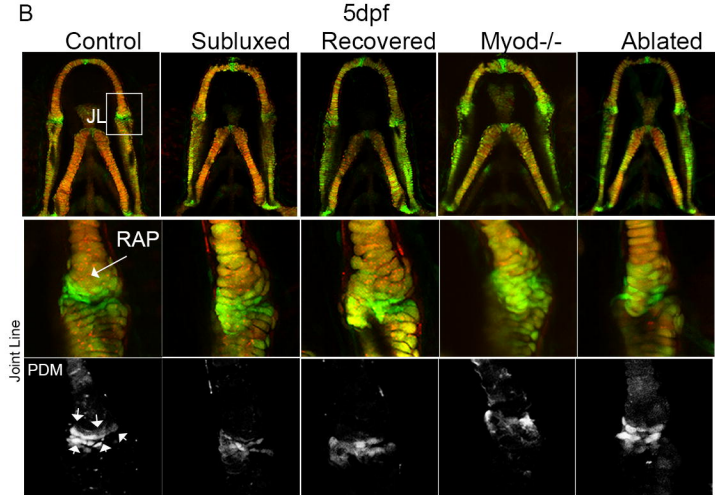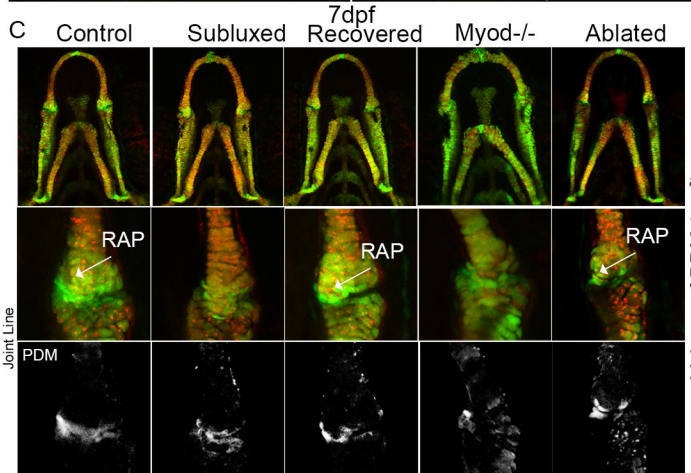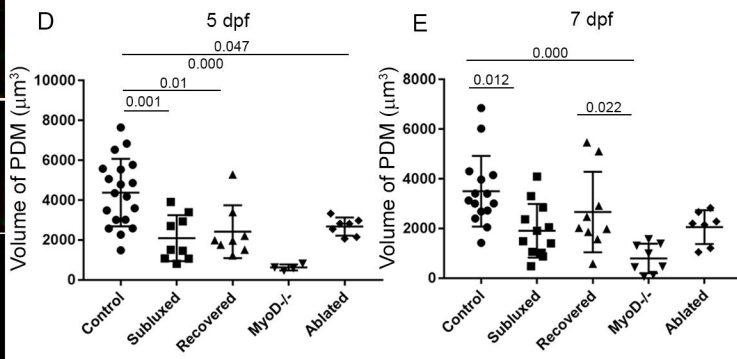

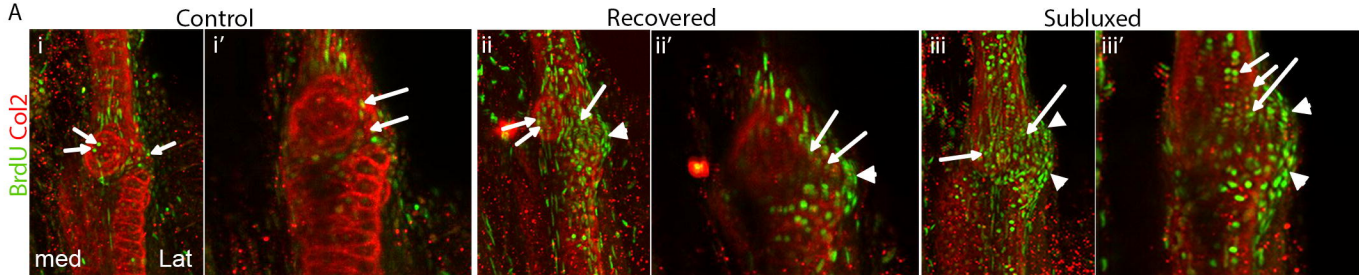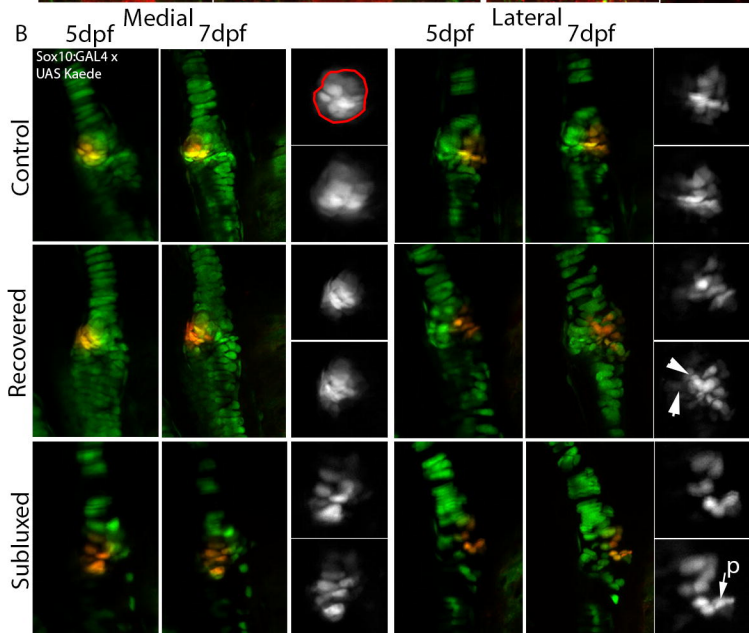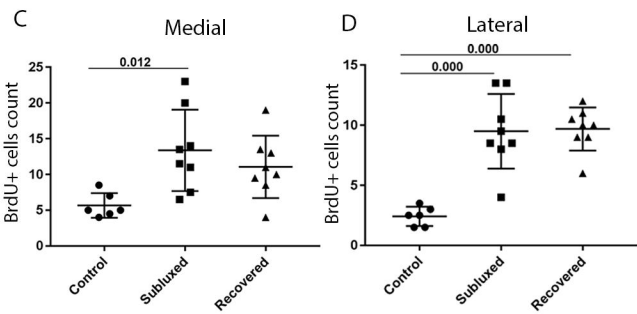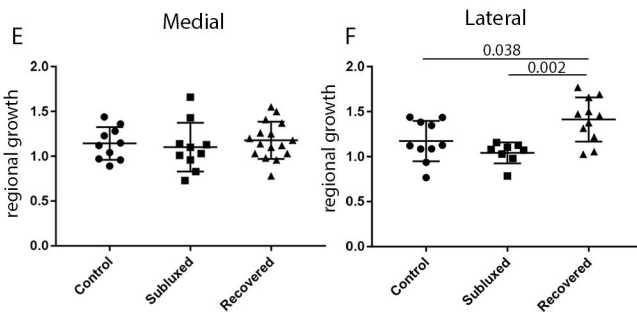

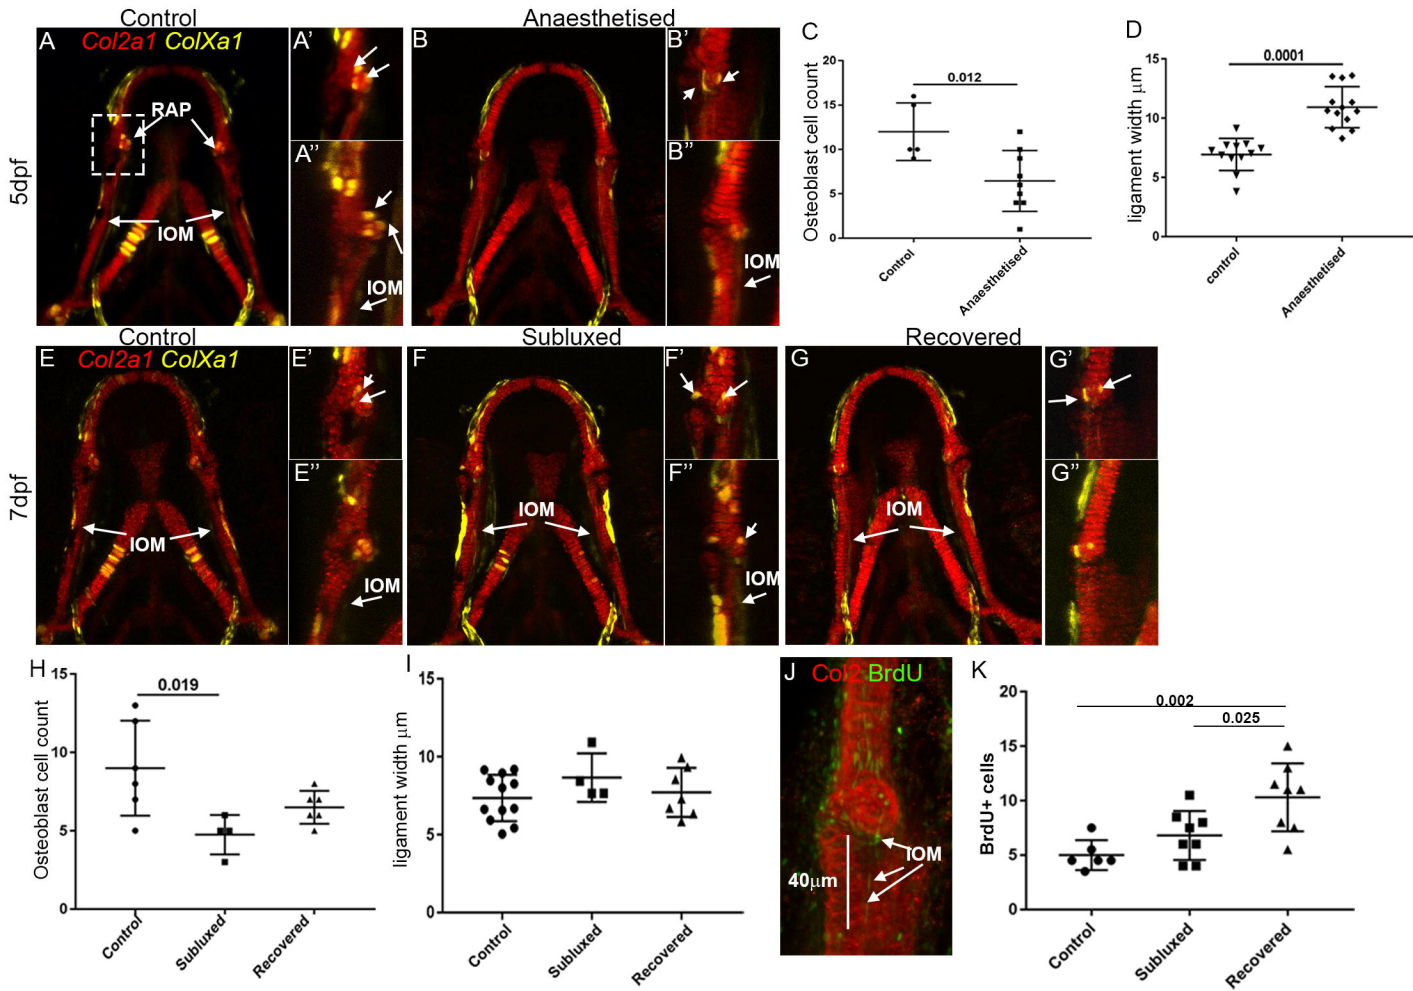

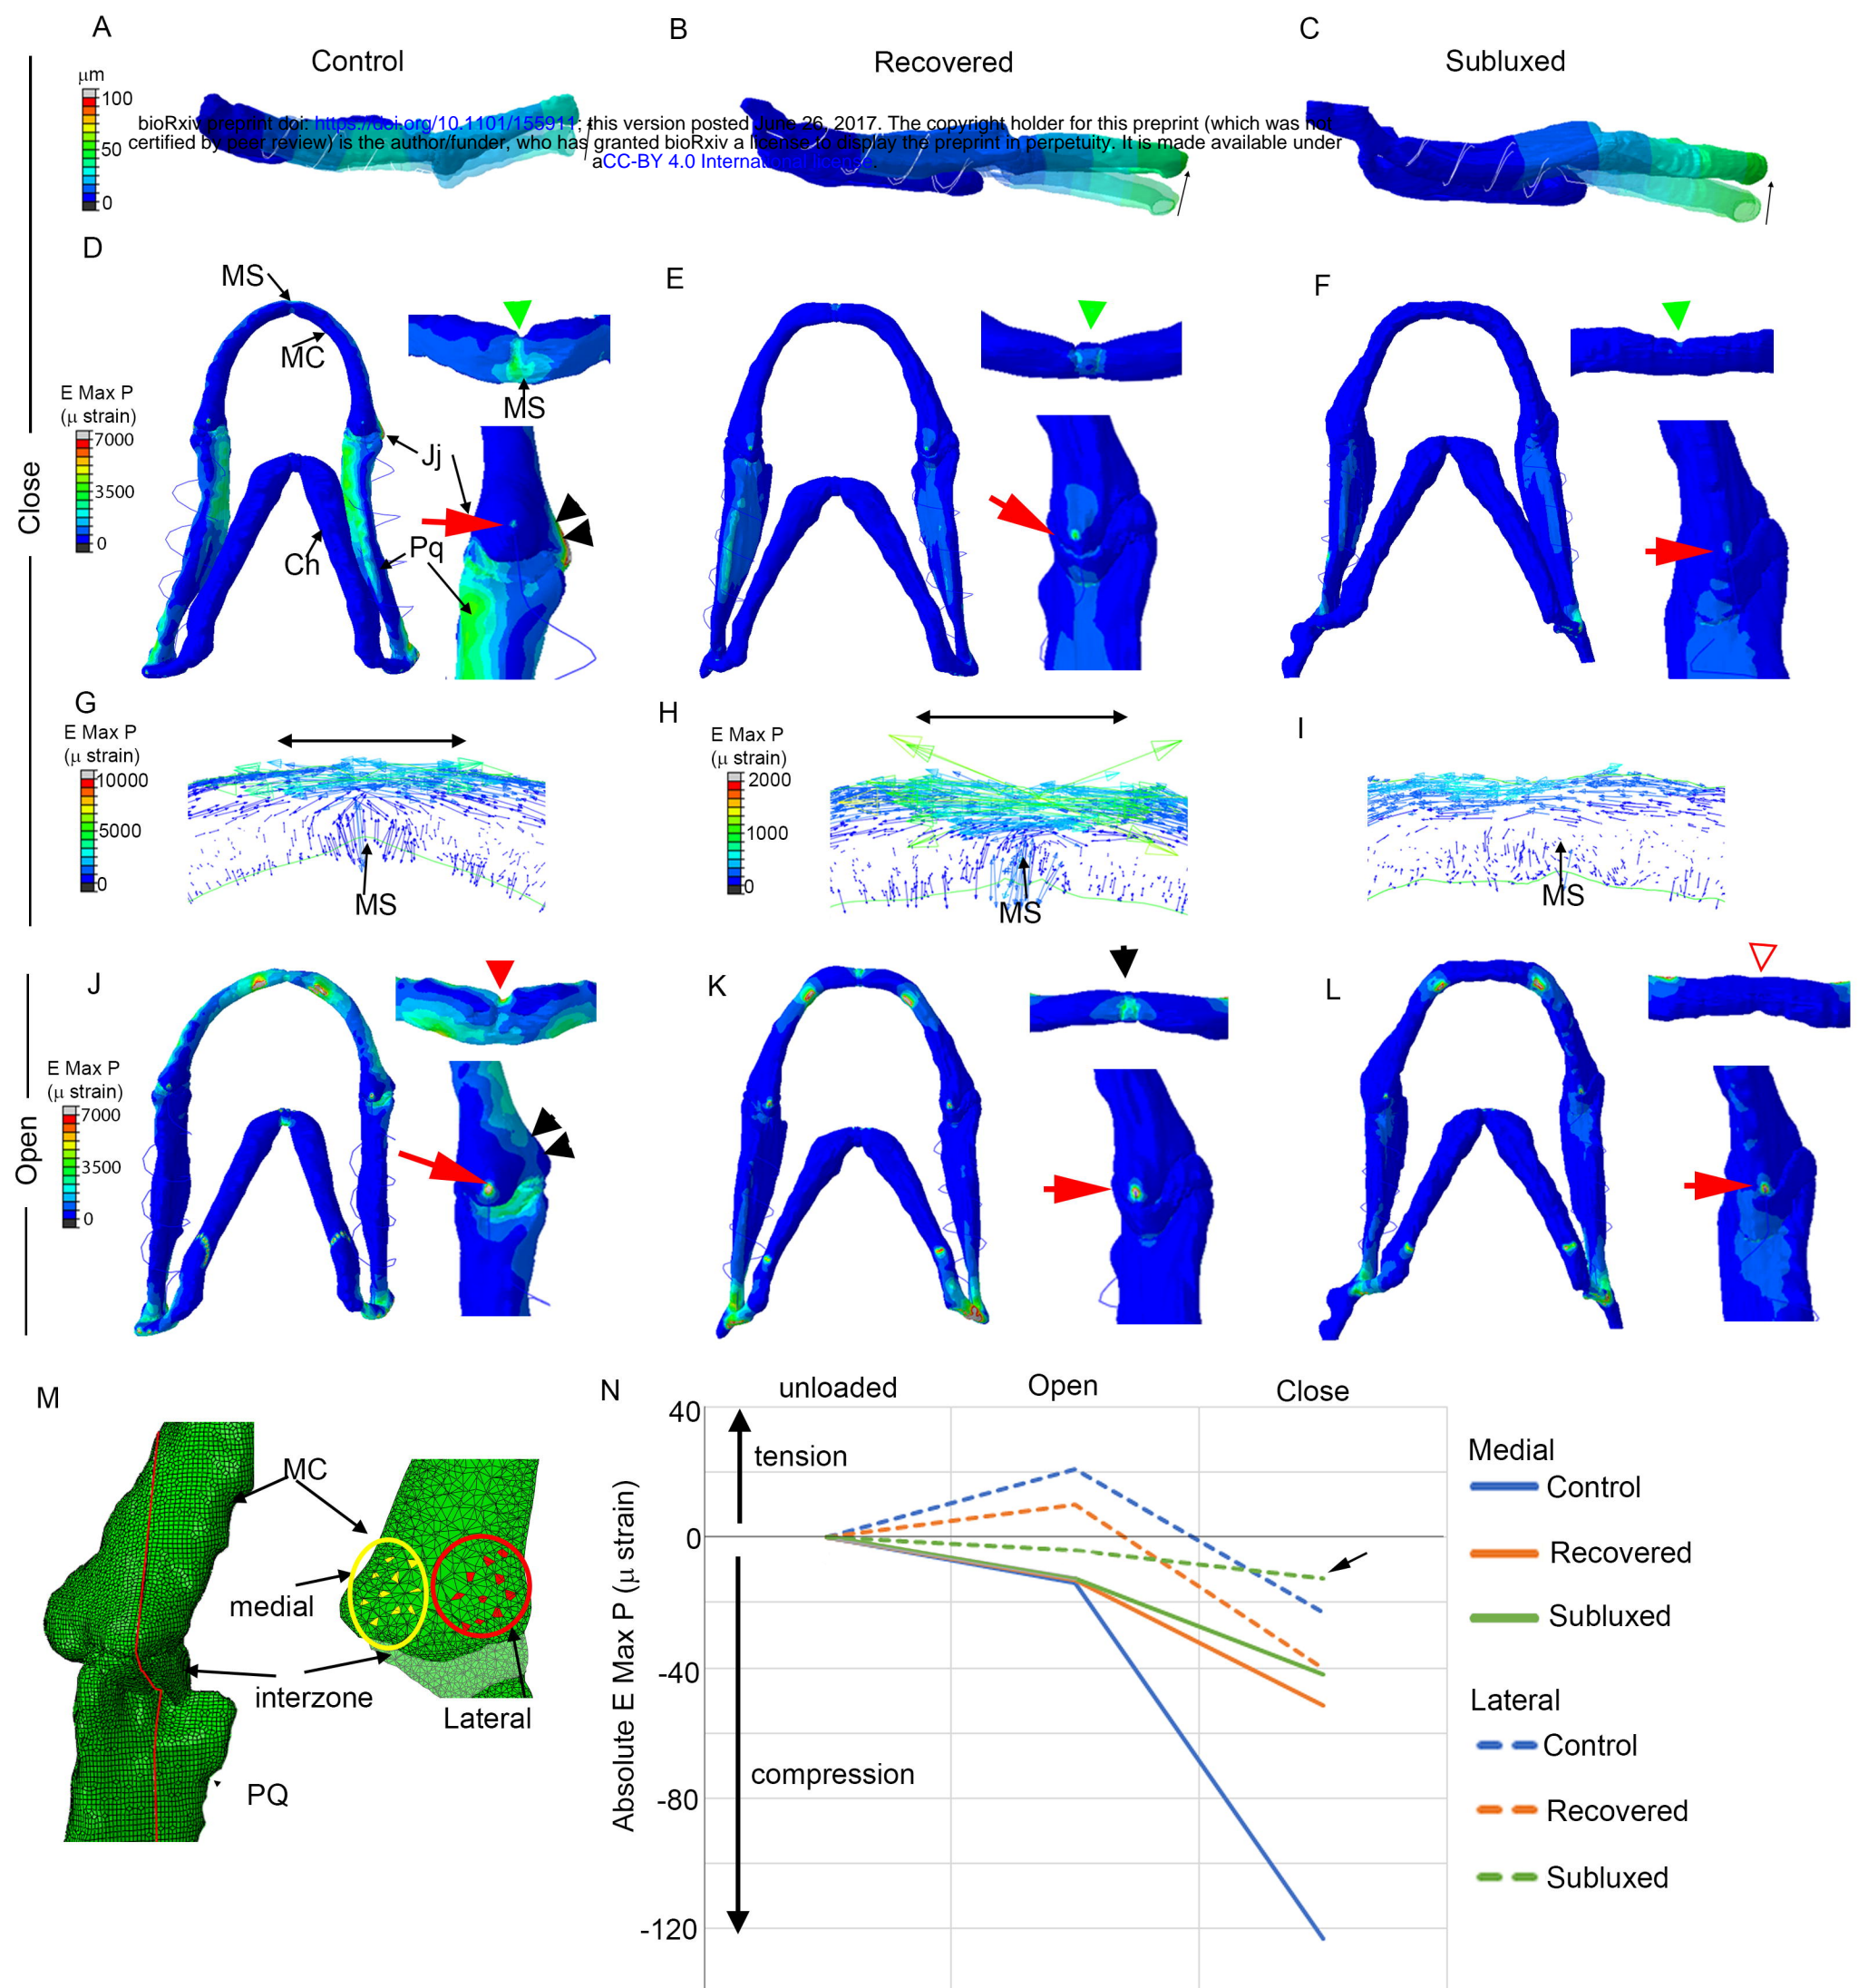

Source: http://www.biorxiv.org/content/10.1101/155911v1.full.pdf
